# Supplementary material for: Beverages Consumption and Oral Health in the Aging Population: A Systematic Review
Source: PubMed Central journal article supplement (PMC8579113; doi:10.3389/fnut.2021.762383), 2021-10-27
Supplement: Data_Sheet_2.pdf [file Data_Sheet_2.pdf]

(Panel A)

|                              | Study question | Population | Participation rate | Inclusion criteria | Sample size | Exposure prior to outcome | Sufficient time frame | Different levels of exposure | Exposure measures | Multiple exposure | Outcome measures | Blinding of outcome | Loss to follow-up | Confounding |
|------------------------------|----------------|------------|--------------------|--------------------|-------------|---------------------------|-----------------------|------------------------------|-------------------|-------------------|------------------|---------------------|-------------------|-------------|
| Drake C.W. et al., 1995      | ✓              | ✓          | ✓                  | ✓                  | X           | ✓                         | ✓                     | ✓                            | ✓                 | X                 | X                | X                   | X                 | X           |
| Norlén P. et al., 1996       | ✓              | ✓          | ✓                  | ✓                  | X           | -                         | -                     | ✓                            | ✓                 | -                 | ✓                | X                   | -                 | X           |
| Hanioka T. et al., 2007      | ✓              | ✓          | -                  | -                  | X           | -                         | -                     | ✓                            | ✓                 | -                 | ✓                | X                   | -                 | ✓           |
| Yoshihara A. et al., 2009    | ✓              | ✓          | ✓                  | ✓                  | X           | ✓                         | ✓                     | ✓                            | ✓                 | ✓                 | ✓                | X                   | -                 | ✓           |
| Heegaard K. et al., 2011     | ✓              | ✓          | X                  | ✓                  | X           | -                         | -                     | ✓                            | ✓                 | -                 | X                | X                   | -                 | ✓           |
| Adegboye A.R.A. et al., 2012 | ✓              | ✓          | X                  | ✓                  | X           | -                         | -                     | ✓                            | ✓                 | -                 | ✓                | X                   | -                 | ✓           |
| Machida T. et al., 2014      | ✓              | ✓          | ✓                  | ✓                  | X           | -                         | -                     | ✓                            | ✓                 | -                 | ✓                | X                   | -                 | ✓           |
| Hach M. et al., 2015         | ✓              | ✓          | X                  | ✓                  | X           | ✓                         | ✓                     | X                            | ✓                 | ✓                 | ✓                | X                   | -                 | ✓           |
| Tiwari T. et al., 2016       | ✓              | ✓          | ✓                  | ✓                  | X           | -                         | -                     | X                            | ✓                 | -                 | X                | X                   | -                 | ✓           |
| Laguzzi P.N. et al., 2016    | ✓              | ✓          | ✓                  | ✓                  | X           | -                         | -                     | ✓                            | ✓                 | -                 | ✓                | X                   | -                 | ✓           |
| Suwama K et al., 2018        | ✓              | ✓          | ✓                  | ✓                  | X           | -                         | -                     | ✓                            | ✓                 | -                 | ✓                | X                   | -                 | X           |
| Peters B.A. et al., 2018     | ✓              | ✓          | ✓                  | ✓                  | X           | X                         | -                     | ✓                            | ✓                 | X                 | ✓                | X                   | ✓                 | ✓           |

✓Reported: element reported appropriately in study

x Not reported: element not mentioned in study

- Not applicable: due to study design, element not applicable to report
