# Supplementary material for: Beverages Consumption and Oral Health in the Aging Population: A Systematic Review
Source: PubMed Central journal article supplement (PMC8579113; doi:10.3389/fnut.2021.762383), 2021-10-27

**Panel B**

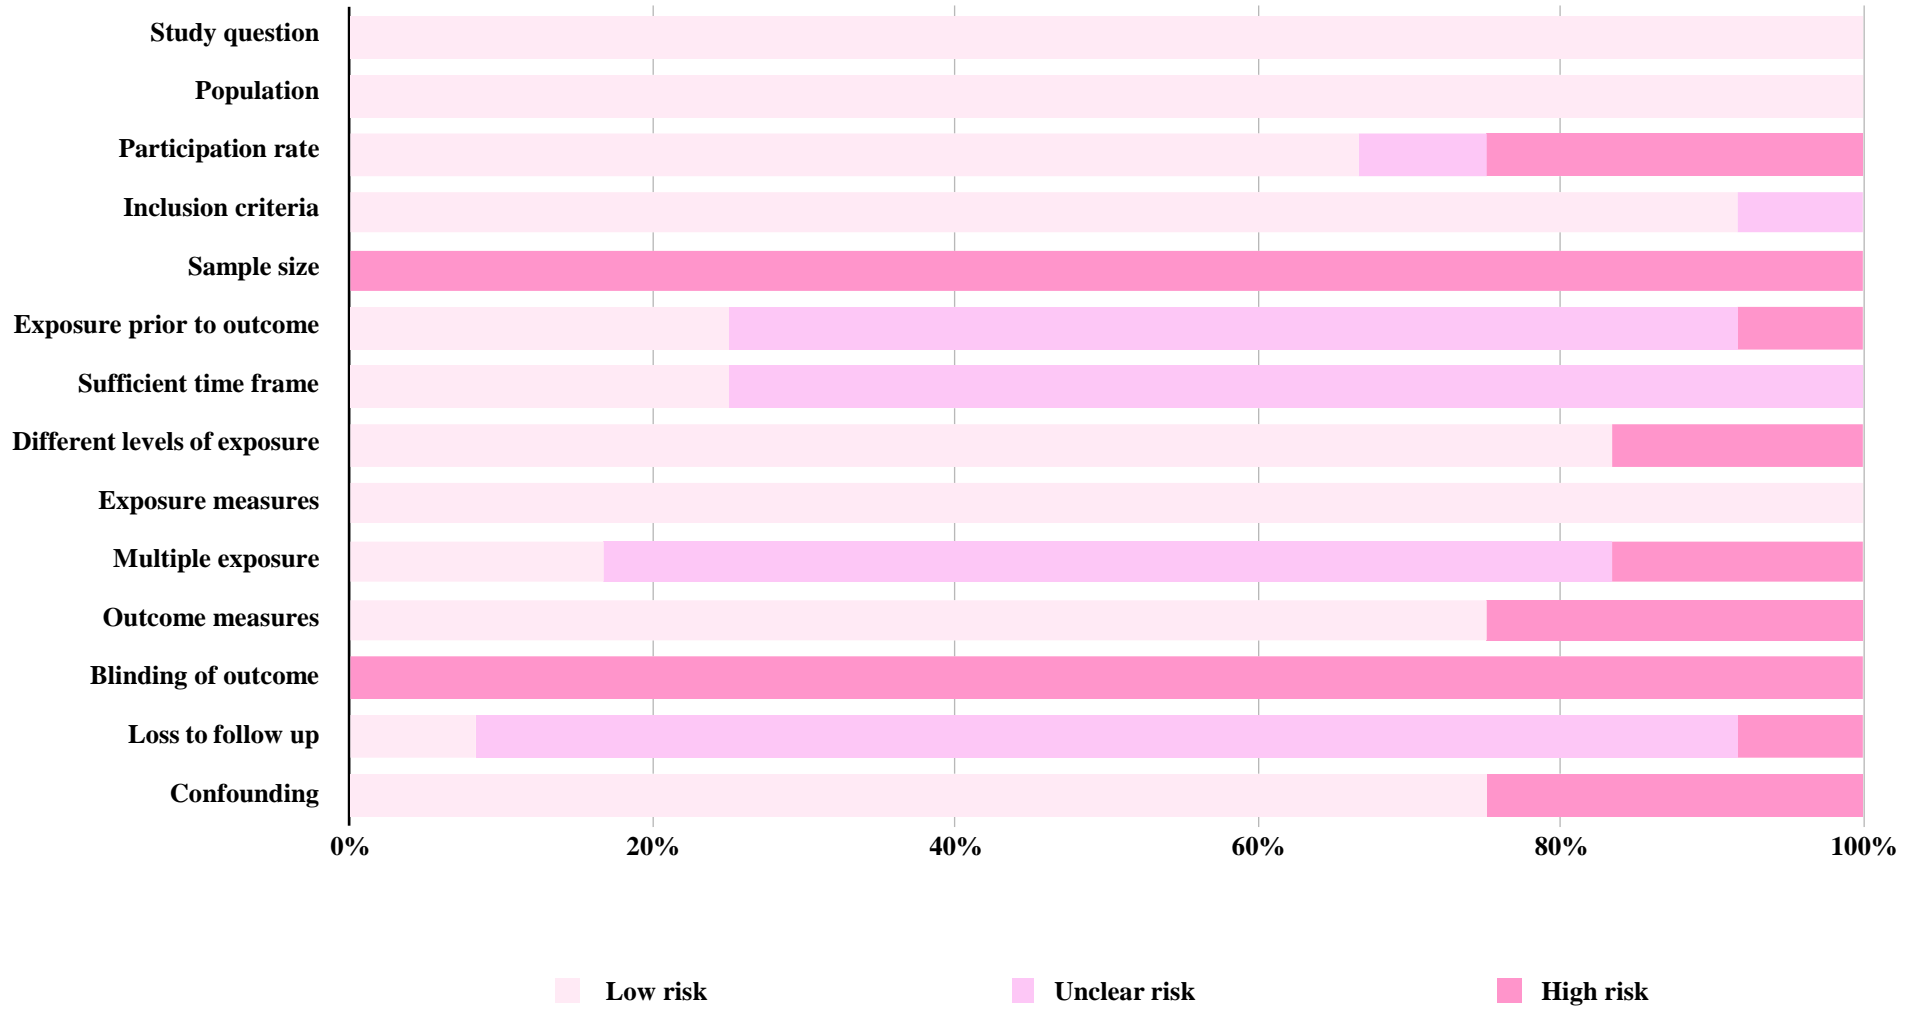

Supplement: Data_Sheet_3.pdf [file Data_Sheet_3.pdf]
